# Supplementary material for: Heterostructured ZnFe2O4/TiO2 nanocomposites with a highly recyclable visible-light-response for bisphenol A degradation
Source: Royal Society of Chemistry journal article supplement (doi:10.1039/c7ra08271a), 2017-01-01
Supplement: c7ra08271a1.pdf [file c7ra08271a1.pdf]

## Electronic Supplementary Information

# Heterostructured ZnFe<sub>2</sub>O<sub>4</sub>/TiO<sub>2</sub> nanocomposites with highly recyclable visible-light-responsive photoactivity for bisphenol A degradation

Thanh Binh Nguyen<sup>1</sup> and Ruey-an Doong<sup>1,2\*</sup>

1. Department of Biomedical Engineering and Environmental Sciences, National Tsing-Hua University, Hsinchu, 30013, Taiwan.
2. Institute of Environmental Engineering, National Chiao Tung University, 1001, University Road, Hsinchu, 30010, Taiwan.

---

\* Corresponding author. 1001 University Road, Institute of Environmental Engineering, National Chiao Tung University, Hsinchu, 30010, Taiwan. E-mail: radoong@nctu.edu.tw; radoong@mx.nthu.edu.tw; Tel: +886-3-5726785; Fax: +886-3-5725958.

**Table S1.** The mass weight of elements of ZnFe<sub>2</sub>O<sub>4</sub>-TiO<sub>2</sub> nanocomposites obtained from EDS spectra.

| Element       | atomic weight | intensity | Mass [%] |
|---------------|---------------|-----------|----------|
| Oxygen (O)    | 16.00         | 64915     | 40.16    |
| Titanium (Ti) | 47.87         | 293360    | 59.10    |
| Iron (Fe)     | 55.85         | 4343      | 0.47     |
| Zinc (Zn)     | 65.38         | 2190      | 0.27     |

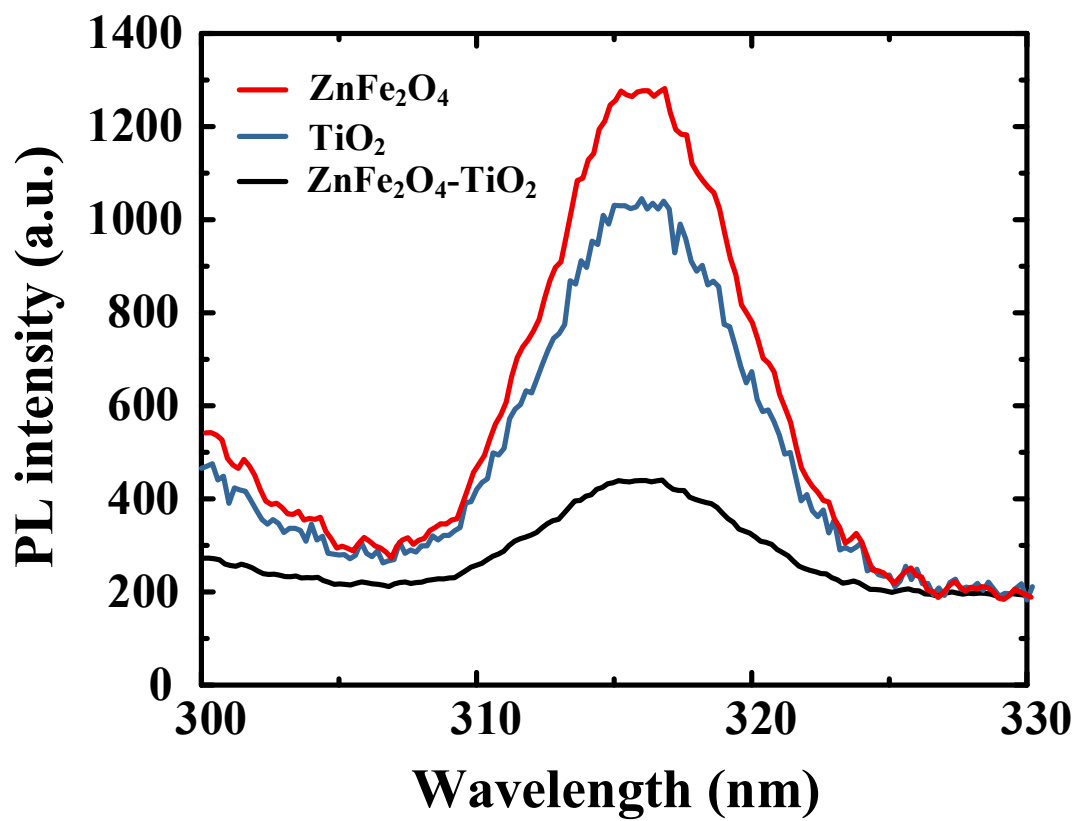

**Fig. S1.** Photoluminescence spectra of ZnFe<sub>2</sub>O<sub>4</sub>, TiO<sub>2</sub> and 1 wt% ZnFe<sub>2</sub>O<sub>4</sub>-TiO<sub>2</sub> at excitation wavelength ( $\lambda_{\text{ex}}$ ) of 285 nm.

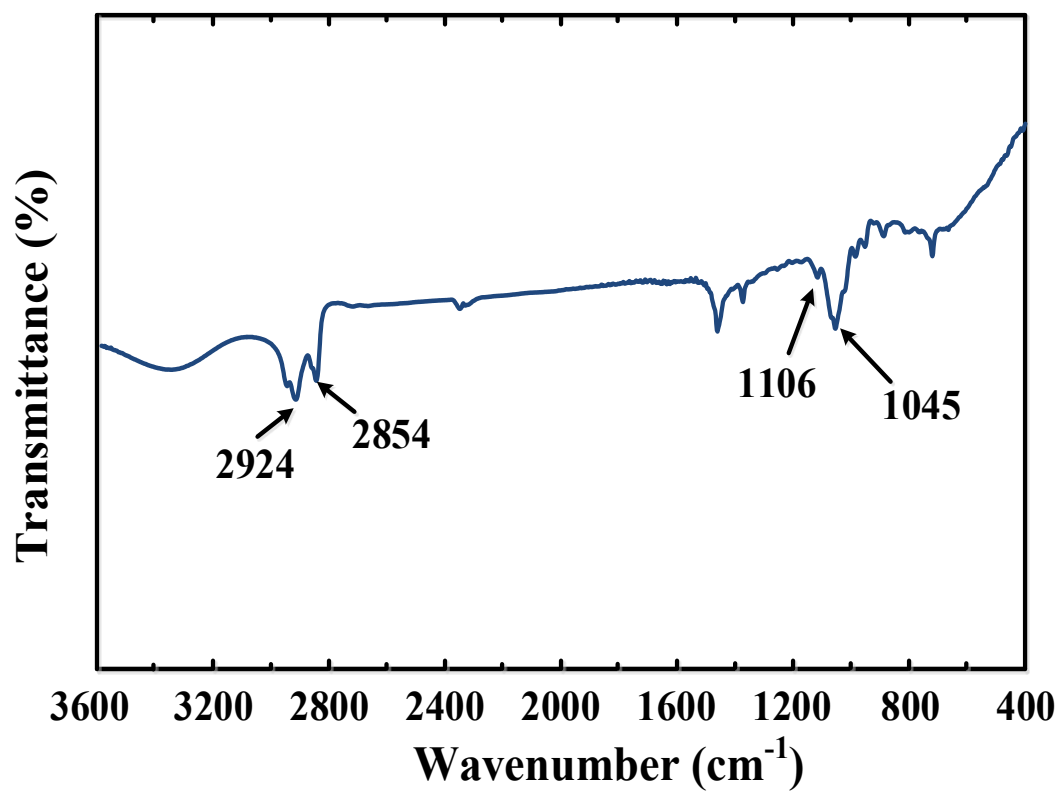

**Fig. S2.** FT-IR spectra of octanol used for the preparation of ZnFe<sub>2</sub>O<sub>4</sub>-TiO<sub>2</sub> nanocomposites using non-aqueous hydrothermal method.

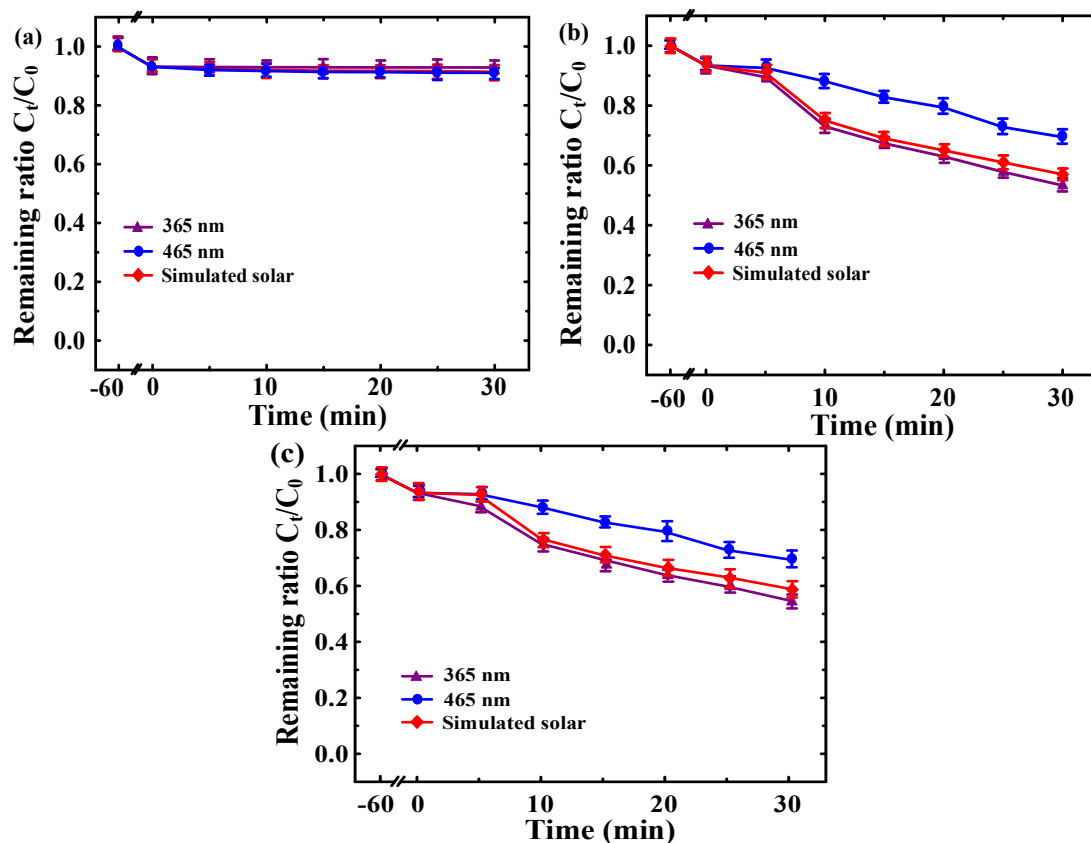

**Fig. S3.** The photodegradation of bisphenol A by (a) as-prepared  $ZnFe_2O_4$ , (b) as-received ST-01  $TiO_2$  and (c) physical mixture of 1 wt%  $ZnFe_2O_4$  with  $TiO_2$  in the presence of different light sources including 365 nm UV light, solar simulator at AM 1.5 and 465 nm visible light.

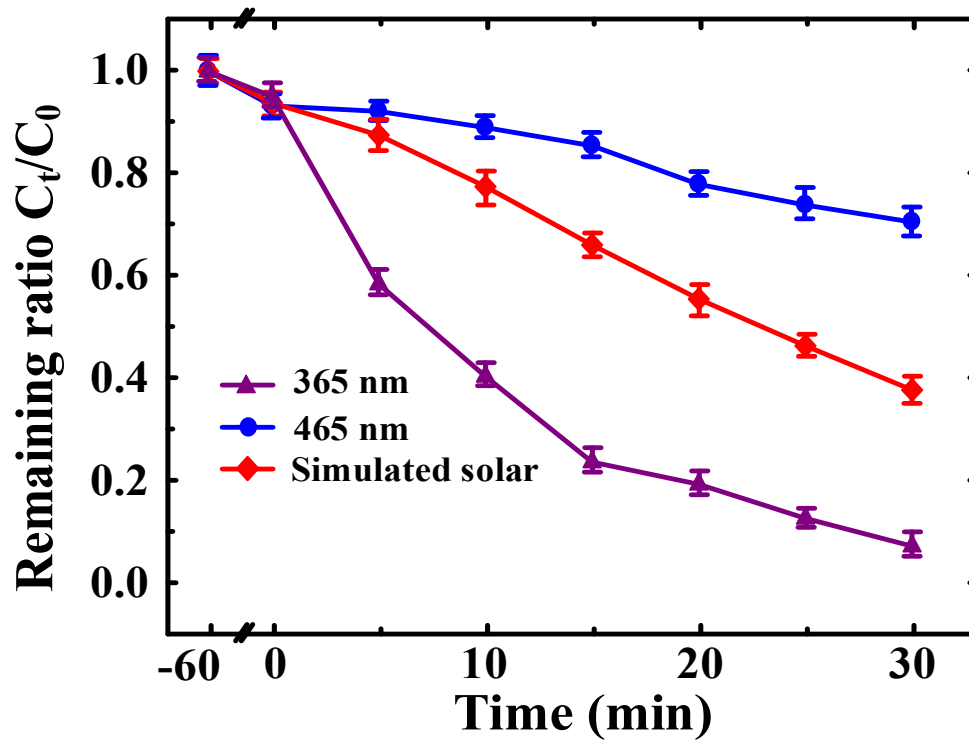

**Fig. S4.** The photodegradation of bisphenol A by Degussa P25 TiO<sub>2</sub> in the presence of different light sources including 365 nm UV light, solar simulator at AM 1.5 and 465 nm visible light.
